# Supplementary material
Source: HighWire-hosted journal article supplement (doi:10.1101/rna.078800.121)
Supplement: Supplemental_Table_1.xlsx [file Supplemental_Table_1.xlsx]

## Sheet: Blad1
Number of Datasets	Sequencing Type	Sequencing Technique	Organism	Tissue&Cell Origin	Tumor Type	Metadata	Article Reference in DOI(If available)	Study/BioProject Accession Number	Run Accession Number	Library Preperation	Number of Aligned Reads	Number of Aligned Reads with Splice Events
1	Longread	ONT	Human + EBV	Stomach	Primary Tumor	PCR-cDNA	In-house Sequencing	In-house Sequencing	In-house Sequencing	PCR-cDNA	165242	140105
1	Longread	ONT	Human + EBV	C666 Cell Line	C666 Cell Line	PCR-cDNA	In-house Sequencing	In-house Sequencing	In-house Sequencing	PCR-cDNA	187460	163503
1	Longread	ONT	Human + EBV	Daudi Cell Line	Daudi Cell Line	PCR-cDNA	In-house Sequencing	In-house Sequencing	In-house Sequencing	PCR-cDNA	884827	740059
1	Shortread	Illumina	Human + EBV	Stomach	Primary Tumor	GAC, TCGA-STAD	10.1038/s41586-020-1969-6	TCGA-STAD	TCGA-BR-4253-01A	polyA+	28794	1057
1	Shortread	Illumina	Human + EBV	Stomach	Primary Tumor	GAC, TCGA-STAD	10.1038/s41586-020-1969-6	TCGA-STAD	TCGA-BR-6455-01A	polyA+	18999	1251
1	Shortread	Illumina	Human + EBV	Stomach	Primary Tumor	GAC, TCGA-STAD	10.1038/s41586-020-1969-6	TCGA-STAD	TCGA-BR-6706-01A	polyA+	11501	574
1	Shortread	Illumina	Human + EBV	Stomach	Primary Tumor	GAC, TCGA-STAD	10.1038/s41586-020-1969-6	TCGA-STAD	TCGA-BR-6707-01A	polyA+	11194	742
1	Shortread	Illumina	Human + EBV	Stomach	Primary Tumor	GAC, TCGA-STAD	10.1038/s41586-020-1969-6	TCGA-STAD	TCGA-BR-7196-01A	polyA+	13135	853
1	Shortread	Illumina	Human + EBV	Stomach	Primary Tumor	GAC, TCGA-STAD	10.1038/s41586-020-1969-6	TCGA-STAD	TCGA-BR-7958-01A	polyA+	2698	204
1	Shortread	Illumina	Human + EBV	Stomach	Primary Tumor	GAC, TCGA-STAD	10.1038/s41586-020-1969-6	TCGA-STAD	TCGA-BR-8366-01A	polyA+	19962	1074
1	Shortread	Illumina	Human + EBV	Stomach	Primary Tumor	GAC, TCGA-STAD	10.1038/s41586-020-1969-6	TCGA-STAD	TCGA-BR-8381-01A	polyA+	13093	917
1	Shortread	Illumina	Human + EBV	Stomach	Primary Tumor	GAC, TCGA-STAD	10.1038/s41586-020-1969-6	TCGA-STAD	TCGA-BR-8589-01A	polyA+	21990	1643
1	Shortread	Illumina	Human + EBV	Stomach	Primary Tumor	GAC, TCGA-STAD	10.1038/s41586-020-1969-6	TCGA-STAD	TCGA-BR-8686-01A	polyA+	38120	2601
1	Shortread	Illumina	Human + EBV	Stomach	Primary Tumor	GAC, TCGA-STAD	10.1038/s41586-020-1969-6	TCGA-STAD	TCGA-BR-A4J4-01A	polyA+	48188	3287
1	Shortread	Illumina	Human + EBV	Stomach	Primary Tumor	GAC, TCGA-STAD	10.1038/s41586-020-1969-6	TCGA-STAD	TCGA-CD-5801-01A	polyA+	13568	1120
1	Shortread	Illumina	Human + EBV	Stomach	Primary Tumor	GAC, TCGA-STAD	10.1038/s41586-020-1969-6	TCGA-STAD	TCGA-CG-5722-01A	polyA+	6884	384
1	Shortread	Illumina	Human + EBV	Stomach	Primary Tumor	GAC, TCGA-STAD	10.1038/s41586-020-1969-6	TCGA-STAD	TCGA-D7-5577-01A	polyA+	11556	650
1	Shortread	Illumina	Human + EBV	Stomach	Primary Tumor	GAC, TCGA-STAD	10.1038/s41586-020-1969-6	TCGA-STAD	TCGA-D7-8570-01A	polyA+	4728	346
1	Shortread	Illumina	Human + EBV	Stomach	Primary Tumor	GAC, TCGA-STAD	10.1038/s41586-020-1969-6	TCGA-STAD	TCGA-D7-8573-01A	polyA+	19706	1252
1	Shortread	Illumina	Human + EBV	Stomach	Primary Tumor	GAC, TCGA-STAD	10.1038/s41586-020-1969-6	TCGA-STAD	TCGA-D7-A4YX-01A	polyA+	41962	2354
1	Shortread	Illumina	Human + EBV	Stomach	Primary Tumor	GAC, TCGA-STAD	10.1038/s41586-020-1969-6	TCGA-STAD	TCGA-FP-7916-01A	polyA+	10667	714
1	Shortread	Illumina	Human + EBV	Stomach	Primary Tumor	GAC, TCGA-STAD	10.1038/s41586-020-1969-6	TCGA-STAD	TCGA-FP-7998-01A	polyA+	14006	906
1	Shortread	Illumina	Human + EBV	Stomach	Primary Tumor	GAC, TCGA-STAD	10.1038/s41586-020-1969-6	TCGA-STAD	TCGA-HU-8608-01A	polyA+	18916	1107
1	Shortread	Illumina	Human + EBV	Stomach	Primary Tumor	GAC, TCGA-STAD	10.1038/s41586-020-1969-6	TCGA-STAD	TCGA-HU-A4G2-01A	polyA+	21367	1116
1	Shortread	Illumina	Human + EBV	Stomach	Primary Tumor	GAC, TCGA-STAD	10.1038/s41586-020-1969-6	TCGA-STAD	TCGA-HU-A4G6-01A	polyA+	61477	3342
1	Shortread	Illumina	Human + EBV	Stomach	Primary Tumor	GAC, TCGA-STAD	10.1038/s41586-020-1969-6	TCGA-STAD	TCGA-HU-A4H0-01A	polyA+	50041	2596
1	Shortread	Illumina	Human + EBV	Stomach	Primary Tumor	GAC, TCGA-STAD	10.1038/s41586-020-1969-6	TCGA-STAD	TCGA-D7-A6EZ-01A	polyA+	8154	458
1	Shortread	Illumina	Human + EBV	Stomach	Primary Tumor	GAC, TCGA-STAD	10.1038/s41586-020-1969-6	TCGA-STAD	TCGA-VQ-A8PF-01A	polyA+	23337	1543
1	Shortread	Illumina	Human + EBV	Stomach	Primary Tumor	GAC, TCGA-STAD	10.1038/s41586-020-1969-6	TCGA-STAD	TCGA-VQ-A923-01A	polyA+	38223	2136
1	Shortread	Illumina	Human + EBV	Stomach	Primary Tumor	GAC, TCGA-STAD	10.1038/s41586-020-1969-6	TCGA-STAD	TCGA-VQ-AA69-01A	polyA+	21992	1161
1	Shortread	Illumina	Human + EBV	Stomach	Primary Tumor	GAC, TCGA-STAD	10.1038/s41586-020-1969-6	TCGA-STAD	TCGA-B7-5818-01A	polyA+	10600	902
106	Shortread	Illumina	Human + EBV	Nasopharynx	Primary Tumor	NPC, Zhang, L., et al, Tumor Cell Content >50%, *2	10.1158/1541-7786.MCR-17-0134	PRJNA397538	SRR5908747-SRR5908859	polyA+	3300224	459854
1	Shortread	Illumina	Human + EBV	C666 Cell Line	C666 Cell Line	C666-1, T	10.1371/journal.ppat.1008071	PRJNA501807	SRR8133536	polyA+	39840	3107
1	Shortread	Illumina	Human + EBV	Daudi Cell Line	Daudi Cell Line	Daudi	10.1038/nature11378	GSE35163	SRA048058	polyA+	69460	6173
21	Shortread	Illumina	Human + EBV	B-cell lymphoma	Primary Tumor	eBL, Kaymaz, Y., et al, EBV reads PPM > 10	10.1158/1541-7786.MCR-16-0305	PRJNA369585	SRR5227620, SRR5227621, SRR5227622, SRR5227624, SRR5227625, SRR5227627, SRR5227628, SRR5227629, SRR5227630, SRR5227631, SRR5227632, SRR5227633, SRR5227634, SRR5227635, SRR5227636, SRR5227637, SRR5227638, SRR5227639, SRR5227640, SRR5227641, SRR5227642	Stranded polyA+	83704	11027
						GAC: Gastric adenocarcinoma
						NPC: Nasopharyngeal carcinoma
						eBL: Endemic Burkitt lymphoma
