# Supplementary material
Source: HighWire-hosted journal article supplement (doi:10.1101/rna.078800.121)
Supplement: Supplemental_Table_2.xlsx [file Supplemental_Table_2.xlsx]

## Sheet: Retrieval and capture rates
Library	Reference	Classification	Filtering	Reads	Transcript variants
C666-1	RefSeq	Intermediate-confidence	Annotated	3956 (3.09%)	9
C666-1	RefSeq	Intermediate-confidence	Incongruent	124226 (96.91%)	573
C666-1	RefSeq	High-confidence	Annotated	3814 (3.31%)	1
C666-1	RefSeq	High-confidence	Incongruent	111467 (96.69%)	80
C666-1	RefSeq + Ia, Ib, II	Intermediate-confidence	Annotated	15486 (12.03%)	22
C666-1	RefSeq + Ia, Ib, II	Intermediate-confidence	Incongruent	113253 (87.97%)	557
C666-1	RefSeq + Ia, Ib, II	High-confidence	Annotated	14977 (12.92%)	4
C666-1	RefSeq + Ia, Ib, II	High-confidence	Incongruent	100911 (87.08%)	76
C666-1	Final FLAME	Intermediate-confidence	Annotated	128012 (95.70%)	245
C666-1	Final FLAME	Intermediate-confidence	Incongruent	5758 (4.30%%)	204
C666-1	Final FLAME	High-confidence	Annotated	122319 (99.06%)	57
C666-1	Final FLAME	High-confidence	Incongruent	1161 (0.94%)	6
GAC	RefSeq	Intermediate-confidence	Annotated	172 (0.16%)	1
GAC	RefSeq	Intermediate-confidence	Incongruent	110777 (99.84%)	541
GAC	RefSeq	High-confidence	Annotated	172 (0.17%)	1
GAC	RefSeq	High-confidence	Incongruent	98869 (99.83%)	91
GAC	RefSeq + Ia, Ib, II	Intermediate-confidence	Annotated	6501 (5.23%)	17
GAC	RefSeq + Ia, Ib, II	Intermediate-confidence	Incongruent	104978 (94,77%)	521
GAC	RefSeq + Ia, Ib, II	High-confidence	Annotated	6232 (6.24%)	6
GAC	RefSeq + Ia, Ib, II	High-confidence	Incongruent	93629 (93,76%)	88
GAC	Final FLAME	Intermediate-confidence	Annotated	114969 (98.39%%)	247
GAC	Final FLAME	Intermediate-confidence	Incongruent	1880 (1.61%)	99
GAC	Final FLAME	High-confidence	Annotated	109464 (99.86%)	74
GAC	Final FLAME	High-confidence	Incongruent	148 (0.14%)	1

## Sheet: Reference annotation
Exon	Start	Length	End
1	138373	108	138480
2	139447	106	139552
3	140558	134	140691
4	146233	102	146334
5	149581	133	149713
6	149581	497	150077
7	149581	768	150348
8	149710	369	150078
9	149923	156	150078
10	149923	426	150348
11	150237	112	150348
12	155267	83	155349
13	155267	282	155548
14	155267	504	155770
15	155267	572	155838
16	155267	1471	156737
17	155350	199	155548
18	155350	1388	156737
19	155549	1189	156737
20	155632	139	155770
21	155632	207	155838
22	155632	1106	156737
23	155771	967	156737
24	155837	901	156737
25	156527	211	156737
26	156645	93	156737
27	156846	83	156928
28	157413	57	157469
29	158625	127	158751
30	158625	259	158883
31	158625	985	159609
32	158625	1294	159918
33	158625	1876	160500
34	158726	1775	160500
35	158884	1617	160500
36	159440	170	159609
37	159440	1061	160500
38	159610	891	160500
39	159781	138	159918
40	159781	720	160500
41	159919	582	160500
42	160221	280	160500
43	160270	231	160500

## Sheet: C666-1 Intermediate-confidence
Count	Length of Transcript	Number of Exons	Isoform Permutation
46062	4249	7	1,4,6,11,16,27,33,
10851	4041	8	1,4,5,9,11,16,27,33,
10597	3220	8	1,4,6,11,16,27,29,40,
8729	3072	8	1,4,6,11,12,25,27,33,
5177	2864	9	1,4,5,9,11,12,25,27,33,
4960	1835	10	1,4,5,9,11,12,25,27,29,40,
3814	3939	7	1,5,9,11,16,27,33,
3397	3012	9	1,4,5,9,11,16,27,29,40,
2799	2043	9	1,4,6,11,12,25,27,29,40,
1713	2762	8	1,5,9,11,12,25,27,33,
1654	4147	6	1,6,11,16,27,33,
1625	2241	11	1,4,5,9,11,13,21,25,27,29,40,
1570	1733	9	1,5,9,11,12,25,27,29,40,
1527	3478	9	1,4,6,11,13,21,25,27,33,
1502	4408	6	1,4,7,16,27,33,
1307	2034	10	1,4,5,9,11,13,25,27,29,40,
1089	2910	8	1,5,9,11,16,27,29,40,
1023	3270	10	1,4,5,9,11,13,21,25,27,33,
992	4383	8	1,3,4,6,11,16,27,33,
850	2954	8	1,4,6,11,12,26,27,33,
815	3063	9	1,4,5,9,11,13,25,27,33,
795	2449	10	1,4,6,11,13,21,25,27,29,40,
755	3561	8	1,4,6,11,15,25,27,33,
664	1717	10	1,4,5,9,11,12,26,27,29,40,
555	1932	9	1,5,9,11,13,25,27,29,40,
552	4166	8	1,4,6,11,13,22,27,33,
510	2746	9	1,4,5,9,11,12,26,27,33,
409	4078	8	1,4,6,11,16,27,31,40,
363	2139	10	1,5,9,11,13,21,25,27,29,40,
337	3118	7	1,6,11,16,27,29,40,
318	1925	9	1,4,6,11,12,26,27,29,40,
313	3206	9	1,3,4,6,11,12,25,27,33,
299	1967	10	1,4,5,9,11,12,25,27,30,40,
292	2970	7	1,6,11,12,25,27,33,
286	3354	9	1,3,4,6,11,16,27,29,40,
279	3168	9	1,5,9,11,13,21,25,27,33,
276	2961	8	1,5,9,11,13,25,27,33,
264	3137	9	1,4,6,11,13,22,27,29,40,
232	4355	8	1,2,4,6,11,16,27,33,
221	2532	9	1,4,6,11,15,25,27,29,40,
215	3379	7	1,4,7,16,27,29,40,
200	1615	9	1,5,9,11,12,26,27,29,40,
187	2644	8	1,5,9,11,12,26,27,33,
173	343	3	1,4,5,
172	3271	8	1,4,6,11,13,25,27,33,
171	3099	11	1,4,5,9,11,13,21,25,27,31,40,
169	3353	9	1,4,5,9,11,15,25,27,33,
154	3958	9	1,4,5,9,11,13,22,27,33,
141	210	2	1,4,
133	2695	5	1,4,6,11,33,
126	2869	9	1,4,6,11,16,27,29,39,43,
122	3870	9	1,4,5,9,11,16,27,31,40,
120	2324	10	1,4,5,9,11,15,25,27,29,40,
119	2177	10	1,3,4,6,11,12,25,27,29,40,
117	3231	7	1,4,7,12,25,27,33,
117	2918	9	1,4,6,11,16,27,29,39,42,
110	1533	11	1,4,5,9,11,12,25,27,29,39,42,
97	2693	10	1,4,5,9,11,12,25,27,31,40,
94	2173	11	1,4,5,9,11,13,20,25,27,29,40,
94	3307	10	1,4,6,11,13,21,25,27,31,40,
93	4175	9	1,3,4,5,9,11,16,27,33,
90	4306	5	1,7,16,27,33,
82	1741	10	1,4,6,11,12,25,27,29,39,42,
80	1692	10	1,4,6,11,12,25,27,29,39,43,
80	4281	7	1,3,6,11,16,27,33,
79	1916	10	1,4,5,9,11,13,26,27,29,40,
76	1969	11	1,3,4,5,9,11,12,25,27,29,40,
73	2361	5	1,12,25,27,33,
73	1458	7	1,4,5,9,11,29,40,
71	3947	8	1,4,6,11,16,27,32,42,
70	819	4	1,4,6,11,
70	3360	9	1,4,6,11,13,21,26,27,33,
68	2632	7	1,4,6,11,16,27,30,
67	2929	10	1,4,5,9,11,13,22,27,29,40,
67	2901	9	1,4,6,11,12,25,27,31,40,
65	2123	11	1,4,5,9,11,13,21,26,27,29,40,
60	2945	9	1,4,5,9,11,13,26,27,33,
60	902	5	1,4,6,11,12,
59	3352	8	1,4,6,11,16,27,30,40,
57	3410	9	1,4,6,11,13,20,25,27,33,
56	2411	12	1,4,5,9,11,13,21,25,27,29,36,40,
54	1101	5	1,4,6,11,13,
54	3768	8	1,5,9,11,16,27,31,40,
54	2661	10	1,4,5,9,11,16,27,29,39,43,
53	4073	8	1,3,5,9,11,16,27,33,
53	1332	6	1,12,25,27,29,40,
53	1865	9	1,5,9,11,12,25,27,30,40,
53	2998	10	1,3,4,5,9,11,12,25,27,33,
52	3326	9	1,2,4,6,11,16,27,29,40,
51	1057	4	1,4,29,40,
51	2086	3	1,4,33,
51	707	3	1,4,6,
51	3612	10	1,3,4,6,11,13,21,25,27,33,
50	2242	9	1,4,6,11,13,25,27,29,40,
48	694	6	1,4,5,9,11,12,
47	1939	12	1,4,5,9,11,13,21,25,27,29,39,42,
47	2385	5	1,5,9,11,33,
47	1356	6	1,5,9,11,29,40,
46	2381	10	1,4,6,11,13,20,25,27,29,40,
45	3856	8	1,5,9,11,13,22,27,33,
42	2373	6	1,4,6,11,16,27,
42	1484	11	1,4,5,9,11,12,25,27,29,39,43,
41	2500	7	1,4,6,11,16,27,29,
41	3898	8	1,4,6,11,16,27,32,43,
40	3251	8	1,5,9,11,15,25,27,33,
40	2222	9	1,5,9,11,15,25,27,29,40,
40	1867	10	1,3,5,9,11,12,25,27,29,40,
40	2290	5	1,4,6,11,16,
39	499	4	1,4,5,9,
39	1814	9	1,5,9,11,13,26,27,29,40,
39	2098	11	1,4,6,11,13,21,25,27,29,39,43,
38	3178	9	1,2,4,6,11,12,25,27,33,
38	2487	6	1,4,5,9,11,33,
38	3376	8	1,6,11,13,21,25,27,33,
37	3202	10	1,4,5,9,11,13,20,25,27,33,
36	1890	12	1,4,5,9,11,13,21,25,27,29,39,43,
36	3146	10	1,3,4,5,9,11,16,27,29,40,
35	2373	11	1,4,5,9,11,13,21,25,27,30,40,
34	2147	11	1,4,6,11,13,21,25,27,29,39,42,
34	1849	10	1,4,5,9,11,12,26,27,30,40,
33	1941	8	1,6,11,12,25,27,29,40,
32	2896	9	1,3,5,9,11,12,25,27,33,
32	3129	6	1,7,12,25,27,33,
31	1683	11	1,4,5,9,11,13,25,27,29,39,43,
31	3152	10	1,4,5,9,11,13,21,26,27,33,
31	2892	10	1,4,5,9,11,13,25,27,31,40,
30	1323	5	1,4,6,11,14,
29	1391	5	1,4,6,11,15,
29	3358	7	1,4,6,11,16,27,31,
29	3443	8	1,4,6,11,15,26,27,33,
29	2666	10	1,3,4,6,11,15,25,27,29,40,
29	611	5	1,4,5,9,11,
27	1434	7	1,4,12,25,27,29,40,
27	955	3	1,29,40,
26	2166	10	1,4,5,9,11,13,25,27,30,40,
26	1431	10	1,5,9,11,12,25,27,29,39,42,
25	1941	11	1,2,4,5,9,11,12,25,27,29,40,
25	2583	11	1,3,4,6,11,13,21,25,27,29,40,
25	2997	10	1,5,9,11,13,21,25,27,31,40,
24	1823	8	1,6,11,12,26,27,29,40,
24	3277	6	1,7,16,27,29,40,
24	3667	7	1,4,6,11,16,27,32,
24	3995	9	1,4,6,11,13,22,27,31,40,
24	4542	7	1,3,4,7,16,27,33,
24	3144	9	1,4,5,9,11,16,27,30,40,
23	4199	7	1,4,5,10,16,27,33,
23	930	3	1,4,40,
23	3493	8	1,4,6,11,14,25,27,33,
23	1415	11	1,4,5,9,11,12,26,27,29,39,42,
23	241	2	1,5,
22	2790	9	1,5,9,11,13,25,27,31,40,
22	3088	9	1,3,4,6,11,12,26,27,33,
21	2175	9	1,4,6,11,12,25,27,30,40,
21	2101	11	1,3,4,5,9,11,12,25,27,30,40,
21	3459	7	1,6,11,15,25,27,33,
20	2005	11	1,4,5,9,11,12,25,27,29,36,40,
20	4300	9	1,3,4,6,11,13,22,27,33,
20	2721	9	1,4,6,11,12,25,27,32,43,
20	2463	6	1,4,12,25,27,33,
20	2424	8	1,4,5,9,11,16,27,30,
20	2149	10	1,2,4,6,11,12,25,27,29,40,
19	1590	7	1,4,5,9,11,30,40,
19	3690	9	1,4,5,9,11,16,27,32,43,
19	4212	9	1,3,4,6,11,16,27,31,40,
19	3118	10	1,2,4,5,9,11,16,27,29,40,
19	2710	10	1,4,5,9,11,16,27,29,39,42,
19	2066	10	1,3,5,9,11,13,25,27,29,40,
19	4064	7	1,6,11,13,22,27,33,
19	3044	9	1,3,5,9,11,16,27,29,40,
18	3640	5	1,4,16,27,33,
18	2181	10	1,4,6,11,15,25,27,29,39,43,
18	1541	8	1,4,5,9,11,12,29,40,
18	2331	10	1,4,6,11,13,21,26,27,29,40,
18	1574	10	1,4,6,11,12,26,27,29,39,43,
18	893	6	1,4,5,9,11,13,
17	3390	9	1,4,6,11,15,25,27,31,40,
17	1366	11	1,4,5,9,11,12,26,27,29,39,43,
17	4489	9	1,2,3,4,6,11,16,27,33,
17	2414	9	1,4,6,11,15,26,27,29,40,
17	2168	11	1,3,4,5,9,11,13,25,27,29,40,
16	2843	8	1,5,9,11,13,26,27,33,
16	3252	8	1,3,6,11,16,27,29,40,
16	1732	11	1,4,5,9,11,13,25,27,29,39,42,
16	1455	8	1,4,6,11,12,25,27,30,
16	4045	8	1,2,5,9,11,16,27,33,
16	1414	7	1,4,5,9,11,12,40,
16	2591	9	1,5,9,11,12,25,27,31,40,
16	1799	8	1,9,11,13,25,27,29,40,
15	2852	7	1,6,11,12,26,27,33,
15	1113	6	1,4,6,11,12,25,
15	2375	12	1,3,4,5,9,11,13,21,25,27,29,40,
15	2165	7	1,4,5,9,11,16,27,
15	1229	5	1,5,9,11,40,
14	2981	11	1,4,5,9,11,13,21,26,27,31,40,
14	2347	9	1,6,11,13,21,25,27,29,40,
14	1196	7	1,4,6,11,12,25,27,
14	2827	9	1,5,9,11,13,22,27,29,40,
14	1884	9	1,4,5,9,11,12,25,30,40,
13	3806	6	1,9,11,16,27,33,
13	2786	10	1,4,6,11,13,22,27,29,39,43,
13	3460	10	1,2,3,4,6,11,16,27,29,40,
13	3095	9	1,3,5,9,11,13,25,27,33,
13	1088	4	1,5,29,40,
13	3050	9	1,5,9,11,13,21,26,27,33,
13	509	4	1,5,9,11,
13	1183	6	1,4,5,9,11,15,
13	4147	9	1,2,4,5,9,11,16,27,33,
13	2575	10	1,4,5,9,11,12,26,27,31,40,
13	2581	10	1,4,6,11,13,21,25,27,30,40,
12	1654	12	1,4,5,9,11,12,25,27,29,36,39,43,
12	2608	9	1,5,9,11,16,27,29,39,42,
12	1616	11	1,4,5,9,11,12,25,27,30,39,43,
12	3584	10	1,2,4,6,11,13,21,25,27,33,
12	397	3	1,5,9,
12	3695	9	1,3,4,6,11,15,25,27,33,
12	3404	11	1,3,4,5,9,11,13,21,25,27,33,
12	828	2	1,40,
12	3104	8	1,3,6,11,12,25,27,33,
12	2316	7	1,4,5,9,11,31,40,
11	1063	4	1,4,5,40,
11	2021	10	1,5,9,11,13,21,26,27,29,40,
11	2271	10	1,5,9,11,13,21,25,27,30,40,
11	3588	8	1,5,9,11,16,27,32,43,
11	2524	6	1,4,6,11,31,40,
11	1666	6	1,4,6,11,29,40,
11	3312	10	1,2,3,4,6,11,12,25,27,33,
11	3538	4	1,16,27,33,
11	1247	9	1,4,5,9,11,12,25,27,30,
11	108	1	1
10	1323	8	1,4,6,11,12,25,27,29,
10	3787	10	1,4,5,9,11,13,22,27,31,40,
10	4166	6	1,4,6,11,16,33,
10	2309	11	1,5,9,11,13,21,25,27,29,36,40,
10	1984	2	1,33,
10	2956	11	1,4,6,11,13,21,25,27,31,39,43,
10	2560	5	1,13,25,27,33,
10	2562	10	1,4,5,9,11,12,25,27,32,42,
10	2042	11	1,4,5,9,11,12,21,25,27,29,40,
10	2204	11	1,4,5,9,11,13,25,27,29,36,40,
10	1382	10	1,5,9,11,12,25,27,29,39,43,
10	2543	12	1,4,5,9,11,13,21,25,27,30,36,40,
10	3127	10	1,4,6,11,13,21,25,27,32,43,
10	3100	9	1,5,9,11,13,20,25,27,33,
10	2273	11	1,3,5,9,11,13,21,25,27,29,40,
10	3035	8	1,6,11,13,22,27,29,40,

## Sheet: C666-1 High-confidence 
Count	Length of Transcript	Number of Exons	Isoform Permutation
46062	4249	7	1,4,6,11,16,27,33,
10851	4041	8	1,4,5,9,11,16,27,33,
10597	3220	8	1,4,6,11,16,27,29,40,
8729	3072	8	1,4,6,11,12,25,27,33,
5177	2864	9	1,4,5,9,11,12,25,27,33,
4960	1835	10	1,4,5,9,11,12,25,27,29,40,
3814	3939	7	1,5,9,11,16,27,33,
3397	3012	9	1,4,5,9,11,16,27,29,40,
2799	2043	9	1,4,6,11,12,25,27,29,40,
1713	2762	8	1,5,9,11,12,25,27,33,
1654	4147	6	1,6,11,16,27,33,
1625	2241	11	1,4,5,9,11,13,21,25,27,29,40,
1570	1733	9	1,5,9,11,12,25,27,29,40,
1527	3478	9	1,4,6,11,13,21,25,27,33,
1502	4408	6	1,4,7,16,27,33,
1307	2034	10	1,4,5,9,11,13,25,27,29,40,
1089	2910	8	1,5,9,11,16,27,29,40,
1023	3270	10	1,4,5,9,11,13,21,25,27,33,
992	4383	8	1,3,4,6,11,16,27,33,
850	2954	8	1,4,6,11,12,26,27,33,
815	3063	9	1,4,5,9,11,13,25,27,33,
795	2449	10	1,4,6,11,13,21,25,27,29,40,
755	3561	8	1,4,6,11,15,25,27,33,
664	1717	10	1,4,5,9,11,12,26,27,29,40,
555	1932	9	1,5,9,11,13,25,27,29,40,
552	4166	8	1,4,6,11,13,22,27,33,
510	2746	9	1,4,5,9,11,12,26,27,33,
409	4078	8	1,4,6,11,16,27,31,40,
363	2139	10	1,5,9,11,13,21,25,27,29,40,
337	3118	7	1,6,11,16,27,29,40,
318	1925	9	1,4,6,11,12,26,27,29,40,
313	3206	9	1,3,4,6,11,12,25,27,33,
299	1967	10	1,4,5,9,11,12,25,27,30,40,
292	2970	7	1,6,11,12,25,27,33,
286	3354	9	1,3,4,6,11,16,27,29,40,
279	3168	9	1,5,9,11,13,21,25,27,33,
276	2961	8	1,5,9,11,13,25,27,33,
264	3137	9	1,4,6,11,13,22,27,29,40,
232	4355	8	1,2,4,6,11,16,27,33,
221	2532	9	1,4,6,11,15,25,27,29,40,
215	3379	7	1,4,7,16,27,29,40,
200	1615	9	1,5,9,11,12,26,27,29,40,
187	2644	8	1,5,9,11,12,26,27,33,
173	343	3	1,4,5,
172	3271	8	1,4,6,11,13,25,27,33,
171	3099	11	1,4,5,9,11,13,21,25,27,31,40,
169	3353	9	1,4,5,9,11,15,25,27,33,
154	3958	9	1,4,5,9,11,13,22,27,33,
141	210	2	1,4,
133	2695	5	1,4,6,11,33,
126	2869	9	1,4,6,11,16,27,29,39,43,
122	3870	9	1,4,5,9,11,16,27,31,40,
120	2324	10	1,4,5,9,11,15,25,27,29,40,
119	2177	10	1,3,4,6,11,12,25,27,29,40,
117	3231	7	1,4,7,12,25,27,33,
117	2918	9	1,4,6,11,16,27,29,39,42,
110	1533	11	1,4,5,9,11,12,25,27,29,39,42,

## Sheet: GAC Intermediate-Confidence
Count	Length of Transcript	Number of Exons	Isoform Permutation
25224	3220	8	1,4,6,11,16,27,29,40,
19164	4249	7	1,4,6,11,16,27,33,
9525	2034	10	1,4,5,9,11,13,25,27,29,40,
9097	3012	9	1,4,5,9,11,16,27,29,40,
5284	4041	8	1,4,5,9,11,16,27,33,
3699	2449	10	1,4,6,11,13,21,25,27,29,40,
3385	3354	9	1,3,4,6,11,16,27,29,40,
3306	2241	11	1,4,5,9,11,13,21,25,27,29,40,
2083	4078	8	1,4,6,11,16,27,31,40,
2030	2242	9	1,4,6,11,13,25,27,29,40,
1707	3478	9	1,4,6,11,13,21,25,27,33,
1570	4383	8	1,3,4,6,11,16,27,33,
1564	1835	10	1,4,5,9,11,12,25,27,29,40,
1460	3137	9	1,4,6,11,13,22,27,29,40,
1196	3063	9	1,4,5,9,11,13,25,27,33,
1050	3271	8	1,4,6,11,13,25,27,33,
1026	4166	8	1,4,6,11,13,22,27,33,
843	2168	11	1,3,4,5,9,11,13,25,27,29,40,
756	3270	10	1,4,5,9,11,13,21,25,27,33,
744	2532	9	1,4,6,11,15,25,27,29,40,
725	2324	10	1,4,5,9,11,15,25,27,29,40,
720	3146	10	1,3,4,5,9,11,16,27,29,40,
683	2043	9	1,4,6,11,12,25,27,29,40,
681	3870	9	1,4,5,9,11,16,27,31,40,
585	2583	11	1,3,4,6,11,13,21,25,27,29,40,
460	3561	8	1,4,6,11,15,25,27,33,
459	3390	9	1,4,6,11,16,27,29,36,40,
443	3326	9	1,2,4,6,11,16,27,29,40,
441	2869	9	1,4,6,11,16,27,29,39,43,
406	2376	10	1,3,4,6,11,13,25,27,29,40,
364	3307	10	1,4,6,11,13,21,25,27,31,40,
358	2929	10	1,4,5,9,11,13,22,27,29,40,
346	2695	5	1,4,6,11,33,
345	3072	8	1,4,6,11,12,25,27,33,
330	4175	9	1,3,4,5,9,11,16,27,33,
300	2204	11	1,4,5,9,11,13,25,27,29,36,40,
297	2375	12	1,3,4,5,9,11,13,21,25,27,29,40,
287	2918	9	1,4,6,11,16,27,29,39,42,
277	2892	10	1,4,5,9,11,13,25,27,31,40,
262	2098	11	1,4,6,11,13,21,25,27,29,39,43,
253	3099	11	1,4,5,9,11,13,21,25,27,31,40,
251	2411	12	1,4,5,9,11,13,21,25,27,29,36,40,
246	2864	9	1,4,5,9,11,12,25,27,33,
234	4355	8	1,2,4,6,11,16,27,33,
231	3182	10	1,4,5,9,11,16,27,29,36,40,
220	4212	9	1,3,4,6,11,16,27,31,40,
219	3353	9	1,4,5,9,11,15,25,27,33,
219	3612	10	1,3,4,6,11,13,21,25,27,33,
215	1458	7	1,4,5,9,11,29,40,
210	3995	9	1,4,6,11,13,22,27,31,40,
209	3271	10	1,3,4,6,11,13,22,27,29,40,
207	1683	11	1,4,5,9,11,13,25,27,29,39,43,
199	1916	10	1,4,5,9,11,13,26,27,29,40,
192	2147	11	1,4,6,11,13,21,25,27,29,39,42,
183	3958	9	1,4,5,9,11,13,22,27,33,
180	3100	9	1,4,6,11,13,25,27,31,40,
172	3939	7	1,5,9,11,16,27,33,
172	3640	5	1,4,16,27,33,
168	1666	6	1,4,6,11,29,40,
163	1932	9	1,5,9,11,13,25,27,29,40,
161	1717	10	1,4,5,9,11,12,26,27,29,40,
157	2910	8	1,5,9,11,16,27,29,40,
156	3405	9	1,3,4,6,11,13,25,27,33,
147	3460	10	1,2,3,4,6,11,16,27,29,40,
143	1969	11	1,3,4,5,9,11,12,25,27,29,40,
142	2619	11	1,4,6,11,13,21,25,27,29,36,40,
138	343	3	1,4,5,
136	210	2	1,4,
133	1890	12	1,4,5,9,11,13,21,25,27,29,39,43,
112	2177	10	1,3,4,6,11,12,25,27,29,40,
107	2666	10	1,3,4,6,11,15,25,27,29,40,
104	1891	10	1,4,6,11,13,25,27,29,39,43,
103	1732	11	1,4,5,9,11,13,25,27,29,39,42,
100	2661	10	1,4,5,9,11,16,27,29,39,43,
97	3197	10	1,3,4,5,9,11,13,25,27,33,
94	2611	6	1,4,16,27,29,40,
85	4300	9	1,3,4,6,11,13,22,27,33,
85	1940	10	1,4,6,11,13,25,27,29,39,42,
82	3390	9	1,4,6,11,15,25,27,31,40,
79	4408	6	1,4,7,16,27,33,
78	2555	11	1,2,4,6,11,13,21,25,27,29,40,
78	2232	12	1,3,4,6,11,13,21,25,27,29,39,43,
77	819	4	1,4,6,11,
74	1633	7	1,4,13,25,27,29,40,
72	1925	9	1,4,6,11,12,26,27,29,40,
71	1939	12	1,4,5,9,11,13,21,25,27,29,39,42,
69	2331	10	1,4,6,11,13,21,26,27,29,40,
68	1057	4	1,4,29,40,
65	3441	11	1,3,4,6,11,13,21,25,27,31,40,
64	3695	9	1,3,4,6,11,15,25,27,33,
63	2381	10	1,4,6,11,13,20,25,27,29,40,
62	2693	10	1,4,5,9,11,12,25,27,31,40,
61	3118	10	1,2,4,5,9,11,16,27,29,40,
59	2487	6	1,4,5,9,11,33,
58	4147	6	1,6,11,16,27,33,
58	3524	10	1,3,4,6,11,16,27,29,36,40,
58	2230	10	1,4,6,11,15,25,27,29,39,42,
57	2181	10	1,4,6,11,15,25,27,29,39,43,
57	1434	7	1,4,12,25,27,29,40,
57	2123	11	1,4,5,9,11,13,21,26,27,29,40,
57	3404	11	1,3,4,5,9,11,13,21,25,27,33,
54	902	5	1,4,6,11,12,
54	1692	10	1,4,6,11,12,25,27,29,39,43,
54	2710	10	1,4,5,9,11,16,27,29,39,42,
52	4004	10	1,3,4,5,9,11,16,27,31,40,
51	2140	11	1,2,4,5,9,11,13,25,27,29,40,
51	1323	5	1,4,6,11,14,
51	3307	10	1,4,6,11,13,22,27,29,36,40,
49	2173	11	1,4,5,9,11,13,20,25,27,29,40,
48	2166	10	1,4,5,9,11,13,25,27,30,40,
48	4489	9	1,2,3,4,6,11,16,27,33,
48	3003	10	1,3,4,6,11,16,27,29,39,43,
48	1101	5	1,4,6,11,13,
47	3898	8	1,4,6,11,16,27,32,43,
45	3206	9	1,3,4,6,11,12,25,27,33,
44	2412	10	1,4,6,11,13,25,27,29,36,40,
43	2139	10	1,5,9,11,13,21,25,27,29,40,
42	2074	11	1,3,4,6,11,13,25,27,29,39,42,
41	2689	12	1,2,3,4,6,11,13,21,25,27,29,40,
41	3182	10	1,4,5,9,11,15,25,27,31,40,
41	2268	12	1,4,6,11,13,21,25,27,29,36,39,43,
40	2829	6	1,3,4,6,11,33,
38	3947	8	1,4,6,11,16,27,32,42,
38	3118	7	1,6,11,16,27,29,40,
37	3787	10	1,4,5,9,11,13,22,27,31,40,
37	4147	9	1,2,4,5,9,11,16,27,33,
37	3052	10	1,3,4,6,11,16,27,29,39,42,
36	2458	11	1,3,4,5,9,11,15,25,27,29,40,
35	2005	11	1,4,5,9,11,12,25,27,29,36,40,
35	611	5	1,4,5,9,11,
35	707	3	1,4,6,
35	2632	7	1,4,6,11,16,27,30,
35	3377	9	1,2,4,6,11,13,25,27,33,
34	3039	10	1,4,6,11,16,27,29,36,39,43,
34	2901	9	1,4,6,11,12,25,27,31,40,
33	2494	11	1,4,5,9,11,15,25,27,29,36,40,
33	3252	8	1,3,6,11,16,27,29,40,
33	1391	5	1,4,6,11,15,
32	2463	6	1,4,12,25,27,33,
31	930	3	1,4,40,
31	2961	8	1,5,9,11,13,25,27,33,
31	3316	11	1,3,4,5,9,11,16,27,29,36,40,
31	2348	10	1,2,4,6,11,13,25,27,29,40,
30	2373	6	1,4,6,11,16,27,
30	3243	10	1,2,4,6,11,13,22,27,29,40,
29	1484	11	1,4,5,9,11,12,25,27,29,39,43,
29	694	6	1,4,5,9,11,12,
29	4184	9	1,2,4,6,11,16,27,31,40,
29	1533	11	1,4,5,9,11,12,25,27,29,39,42,
28	3584	10	1,2,4,6,11,13,21,25,27,33,
28	2753	12	1,3,4,6,11,13,21,25,27,29,36,40,
28	2500	7	1,4,6,11,16,27,29,
28	1733	9	1,5,9,11,12,25,27,29,40,
28	2213	10	1,4,6,11,12,25,27,29,36,40,
27	2290	5	1,4,6,11,16,
27	1741	10	1,4,6,11,12,25,27,29,39,42,
27	3088	10	1,4,6,11,16,27,29,36,39,42,
27	499	4	1,4,5,9,
27	3252	11	1,2,3,4,5,9,11,16,27,29,40,
27	1817	12	1,3,4,5,9,11,13,25,27,29,39,43,
26	1967	10	1,4,5,9,11,12,25,27,30,40,
26	3234	10	1,3,4,6,11,13,25,27,31,40,
26	2746	9	1,4,5,9,11,12,26,27,33,
25	2274	12	1,2,3,4,5,9,11,13,25,27,29,40,
25	1800	7	1,3,4,6,11,29,40,
25	2025	11	1,3,4,6,11,13,25,27,29,39,43,
25	2998	10	1,3,4,5,9,11,12,25,27,33,
25	3026	11	1,3,4,5,9,11,13,25,27,31,40,
25	3063	11	1,3,4,5,9,11,13,22,27,29,40,
24	2545	13	1,3,4,5,9,11,13,21,25,27,29,36,40,
24	2091	11	1,4,5,9,11,13,25,27,28,29,40,
23	242	2	1,3,
23	2124	9	1,4,6,11,13,26,27,29,40,
23	1941	11	1,2,4,5,9,11,12,25,27,29,40,
22	2347	12	1,2,4,5,9,11,13,21,25,27,29,40,
22	2524	6	1,4,6,11,31,40,
22	893	6	1,4,5,9,11,13,
22	2086	3	1,4,33,
22	2281	12	1,3,4,6,11,13,21,25,27,29,39,42,
21	3360	9	1,4,6,11,13,21,26,27,33,
21	3352	8	1,4,6,11,16,27,30,40,
21	2482	11	1,2,3,4,6,11,13,25,27,29,40,
21	3044	9	1,3,5,9,11,16,27,29,40,
20	2786	10	1,4,6,11,13,22,27,29,39,43,
20	3277	9	1,4,6,11,16,27,28,29,40,
19	2050	11	1,3,4,5,9,11,13,26,27,29,40,
19	2844	11	1,3,4,5,9,11,16,27,29,39,42,
19	344	3	1,3,4,
19	3358	7	1,4,6,11,16,27,31,
19	3379	7	1,4,7,16,27,29,40,
19	2954	8	1,4,6,11,12,26,27,33,
18	2546	11	1,3,4,6,11,13,25,27,29,36,40,
18	2338	12	1,3,4,5,9,11,13,25,27,29,36,40,
18	2317	12	1,4,6,11,13,21,25,27,29,36,39,42,
17	2638	8	1,4,6,11,16,27,29,39,
17	2638	10	1,2,4,6,11,15,25,27,29,40,
17	3727	9	1,4,6,11,16,27,31,39,43,
17	1973	11	1,4,5,9,11,15,25,27,29,39,43,
16	2022	11	1,4,5,9,11,15,25,27,29,39,42,
16	3168	9	1,5,9,11,13,21,25,27,33,
16	1951	9	1,4,5,9,11,13,25,29,40,
15	1115	6	1,4,5,9,11,14,
15	1183	6	1,4,5,9,11,15,
15	2831	11	1,4,5,9,11,16,27,29,36,39,43,
15	2073	13	1,3,4,5,9,11,13,21,25,27,29,39,42,
15	2351	11	1,4,6,11,15,25,27,29,36,39,43,
14	2515	11	1,3,4,6,11,13,20,25,27,29,40,
14	3410	9	1,4,6,11,13,20,25,27,33,
14	1866	12	1,3,4,5,9,11,13,25,27,29,39,42,
14	3718	11	1,2,3,4,6,11,13,21,25,27,33,
14	2835	10	1,4,6,11,13,22,27,29,39,42,
14	1851	11	1,3,4,5,9,11,12,26,27,29,40,
13	2298	12	1,4,5,9,11,13,21,25,27,28,29,40,
13	4129	10	1,3,4,6,11,13,22,27,31,40,
13	2060	13	1,4,5,9,11,13,21,25,27,29,36,39,43,
13	2024	13	1,3,4,5,9,11,13,21,25,27,29,39,43,
13	1104	7	1,4,5,9,11,13,25,
13	1923	7	1,4,15,25,27,29,40,
13	4272	9	1,2,4,6,11,13,22,27,33,
13	3667	9	1,2,4,6,11,15,25,27,33,
13	1853	12	1,4,5,9,11,13,25,27,29,36,39,43,
13	4281	10	1,2,3,4,5,9,11,16,27,33,
12	3544	10	1,3,4,6,11,13,20,25,27,33,
12	2762	8	1,5,9,11,12,25,27,33,
12	3667	7	1,4,6,11,16,27,32,
12	2165	7	1,4,5,9,11,16,27,
12	3487	10	1,3,4,5,9,11,15,25,27,33,
12	2945	9	1,4,5,9,11,13,26,27,33,
12	3144	9	1,4,5,9,11,16,27,30,40,
12	1799	8	1,9,11,13,25,27,29,40,
11	2414	9	1,4,6,11,15,26,27,29,40,
11	2702	10	1,4,6,11,15,25,27,29,36,40,
11	1356	6	1,5,9,11,29,40,
11	2082	6	1,4,5,9,11,16,
11	4281	7	1,3,6,11,16,27,33,
11	1531	6	1,13,25,27,29,40,
11	2149	10	1,2,4,6,11,12,25,27,29,40,
11	1826	11	1,3,4,6,11,12,25,27,29,39,43,
11	1364	7	1,4,6,11,29,39,42,
11	2509	5	1,16,27,29,40,
11	3776	9	1,4,6,11,16,27,31,39,42,
10	2066	10	1,3,5,9,11,13,25,27,29,40,
10	1394	9	1,4,5,9,11,13,21,25,27,
10	3768	8	1,5,9,11,16,27,31,40,
10	3908	7	1,4,9,11,16,27,33,
10	3099	11	1,4,5,9,11,13,22,27,29,36,40,
10	2307	12	1,3,4,5,9,11,13,20,25,27,29,40,

## Sheet: GAC High-Confidence
Count	Length of Transcript	Number of Exons	Isoform Permutation
25224	3220	8	1,4,6,11,16,27,29,40,
19164	4249	7	1,4,6,11,16,27,33,
9525	2034	10	1,4,5,9,11,13,25,27,29,40,
9097	3012	9	1,4,5,9,11,16,27,29,40,
5284	4041	8	1,4,5,9,11,16,27,33,
3699	2449	10	1,4,6,11,13,21,25,27,29,40,
3385	3354	9	1,3,4,6,11,16,27,29,40,
3306	2241	11	1,4,5,9,11,13,21,25,27,29,40,
2083	4078	8	1,4,6,11,16,27,31,40,
2030	2242	9	1,4,6,11,13,25,27,29,40,
1707	3478	9	1,4,6,11,13,21,25,27,33,
1570	4383	8	1,3,4,6,11,16,27,33,
1564	1835	10	1,4,5,9,11,12,25,27,29,40,
1460	3137	9	1,4,6,11,13,22,27,29,40,
1196	3063	9	1,4,5,9,11,13,25,27,33,
1050	3271	8	1,4,6,11,13,25,27,33,
1026	4166	8	1,4,6,11,13,22,27,33,
843	2168	11	1,3,4,5,9,11,13,25,27,29,40,
756	3270	10	1,4,5,9,11,13,21,25,27,33,
744	2532	9	1,4,6,11,15,25,27,29,40,
725	2324	10	1,4,5,9,11,15,25,27,29,40,
720	3146	10	1,3,4,5,9,11,16,27,29,40,
683	2043	9	1,4,6,11,12,25,27,29,40,
681	3870	9	1,4,5,9,11,16,27,31,40,
585	2583	11	1,3,4,6,11,13,21,25,27,29,40,
460	3561	8	1,4,6,11,15,25,27,33,
459	3390	9	1,4,6,11,16,27,29,36,40,
443	3326	9	1,2,4,6,11,16,27,29,40,
441	2869	9	1,4,6,11,16,27,29,39,43,
406	2376	10	1,3,4,6,11,13,25,27,29,40,
364	3307	10	1,4,6,11,13,21,25,27,31,40,
358	2929	10	1,4,5,9,11,13,22,27,29,40,
346	2695	5	1,4,6,11,33,
345	3072	8	1,4,6,11,12,25,27,33,
330	4175	9	1,3,4,5,9,11,16,27,33,
300	2204	11	1,4,5,9,11,13,25,27,29,36,40,
297	2375	12	1,3,4,5,9,11,13,21,25,27,29,40,
287	2918	9	1,4,6,11,16,27,29,39,42,
277	2892	10	1,4,5,9,11,13,25,27,31,40,
262	2098	11	1,4,6,11,13,21,25,27,29,39,43,
253	3099	11	1,4,5,9,11,13,21,25,27,31,40,
251	2411	12	1,4,5,9,11,13,21,25,27,29,36,40,
246	2864	9	1,4,5,9,11,12,25,27,33,
234	4355	8	1,2,4,6,11,16,27,33,
231	3182	10	1,4,5,9,11,16,27,29,36,40,
220	4212	9	1,3,4,6,11,16,27,31,40,
219	3353	9	1,4,5,9,11,15,25,27,33,
219	3612	10	1,3,4,6,11,13,21,25,27,33,
215	1458	7	1,4,5,9,11,29,40,
210	3995	9	1,4,6,11,13,22,27,31,40,
209	3271	10	1,3,4,6,11,13,22,27,29,40,
207	1683	11	1,4,5,9,11,13,25,27,29,39,43,
199	1916	10	1,4,5,9,11,13,26,27,29,40,
192	2147	11	1,4,6,11,13,21,25,27,29,39,42,
183	3958	9	1,4,5,9,11,13,22,27,33,
180	3100	9	1,4,6,11,13,25,27,31,40,
172	3939	7	1,5,9,11,16,27,33,
172	3640	5	1,4,16,27,33,
168	1666	6	1,4,6,11,29,40,
163	1932	9	1,5,9,11,13,25,27,29,40,
161	1717	10	1,4,5,9,11,12,26,27,29,40,
157	2910	8	1,5,9,11,16,27,29,40,
156	3405	9	1,3,4,6,11,13,25,27,33,
147	3460	10	1,2,3,4,6,11,16,27,29,40,
143	1969	11	1,3,4,5,9,11,12,25,27,29,40,
142	2619	11	1,4,6,11,13,21,25,27,29,36,40,
138	343	3	1,4,5,
136	210	2	1,4,
133	1890	12	1,4,5,9,11,13,21,25,27,29,39,43,
112	2177	10	1,3,4,6,11,12,25,27,29,40,
107	2666	10	1,3,4,6,11,15,25,27,29,40,
104	1891	10	1,4,6,11,13,25,27,29,39,43,
103	1732	11	1,4,5,9,11,13,25,27,29,39,42,
100	2661	10	1,4,5,9,11,16,27,29,39,43,
