# Supplementary material
Source: HighWire-hosted journal article supplement (doi:10.1101/rna.078800.121)
Supplement: Supplemental_Table_3.xlsx [file Supplemental_Table_3.xlsx]

## Sheet: Sheet1
Name	GAC transcript variant	C666 transcript variant	Sequence
ORF_6	GAC2, GAC5, GAC9, GAC11, GAC12	C666_1, C666_2, C666_4, C666_5, C666_7, C666_10, C666_11, C666_14, C666_15	MRASSQ
ORF_8	GAC1, GAC2, GAC3, GAC4, GAC5, GAC6, GAC8, GAC9, GAC10, GAC11, GAC13, GAC14, GAC15	C666_1, C666_2, C666_3, C666_4, C666_5, C666_6, C666_8, C666_9, C666_14, C666_15	MPLNVSLS
ORF_10A	GAC1, GAC2, GAC6, GAC7, GAC9, GAC10, GAC11, GAC12, GAC14	C666_1, C666_3, C666_4, C666_9, C666_11, C666_14, C666_15	MSLCPGRICR
ORF_10B	GAC7, GAC12		MKNHIHVICR
ORF_11	GAC1, GAC2, GAC4, GAC5, GAC7, GAC9, GAC12, GAC14	C666_1, C666_2, C666_3, C666_7, C666_8, C666_11, C666_15	MAPHTPVYPME
ORF_12A	GAC1, GAC2, GAC3, GAC4, GAC5, GAC6, GAC7, GAC8, GAC9, GAC10, GAC11, GAC12, GAC13, GAC14, GAC15	C666_1, C666_2, C666_3, C666_4, C666_5, C666_6, C666_8, C666_9, C666_10, C666_11, C666_12, C666_13, C666_14, C666_15	MAFTGHTFPGNV
ORF_12B	GAC2, GAC5, GAC9, GAC11, GAC12, GAC15	C666_1, C666_2, C666_4, C666_5, C666_7, C666_10, C666_11, C666_14, C666_15	MPVSPRVRCRSC
ORF_12C		C666_15	MRGRSRTSTRLS
ORF_14	GAC1, GAC2, GAC3, GAC4, GAC5, GAC6, GAC7, GAC8, GAC9, GAC10, GAC11, GAC12, GAC13, GAC14, GAC15	C666_1, C666_2, C666_3, C666_4, C666_5, C666_6, C666_7, C666_8, C666_9, C666_10, C666_11, C666_13, C666_14, C666_15	METSKGNWQEQGVT
ORF_16	GAC1, GAC2, GAC4, GAC5, GAC7, GAC9, GAC12, GAC14	C666_1, C666_2, C666_3, C666_8, C666_11, C666_15	MPFPSSSPPTTVRESW
ORF_18	GAC7, GAC12		MLHEKPHTRDMPLNVSLS
ORF_22A	GAC1, GAC2, GAC4, GAC5, GAC7, GAC9, GAC12, GAC14	C666_1, C666_2, C666_3, C666_8, C666_11, C666_15	MRRRYSLSGFFRRPLLGLRKGL
ORF_22B	GAC1, GAC2, GAC4, GAC5, GAC7, GAC9, GAC12, GAC14	C666_1, C666_2, C666_3, C666_7, C666_8, C666_11, C666_15	MMACNSVLLMGLMPGPSPEACC
ORF_23	GAC1, GAC2, GAC3, GAC4, GAC5, GAC6, GAC7, GAC8, GAC9, GAC10, GAC11, GAC12, GAC13, GAC14, GAC15	C666_1, C666_2, C666_3, C666_4, C666_5, C666_6, C666_7, C666_8, C666_9, C666_10, C666_11, C666_12, C666_13, C666_14, C666_15	MGLTPRKRPSRSRARSRLSSPMV
ORF_24	GAC1, GAC2, GAC3, GAC4, GAC5, GAC6, GAC7, GAC8, GAC9, GAC10, GAC11, GAC12, GAC13, GAC14, GAC15	C666_1, C666_2, C666_3, C666_4, C666_5, C666_6, C666_7, C666_8, C666_9, C666_10, C666_11, C666_12, C666_13, C666_14, C666_15	MSEEKRNRSPWLESSQTRKGKLVC
ORF_27A	GAC1, GAC2, GAC6, GAC7, GAC9, GAC10, GAC11, GAC12, GAC14	C666_1, C666_3, C666_4, C666_9, C666_11, C666_14, C666_15	MCEYGRMTLEMGACAAPAGKAGTRPGW
ORF_27B	GAC3, GAC4, GAC5, GAC7, GAC8, GAC9, GAC10, GAC11, GAC12, GAC13, GAC14, GAC15	C666_1, C666_2, C666_3, C666_4, C666_5, C666_6, C666_7, C666_8, C666_9, C666_10, C666_11, C666_12, C666_13, C666_14, C666_15	MGSSGVSFGHGRSSSTGKVPSVSRMRL
ORF_27C	GAC9		MARYWGCAVKAAAQSAFSASTASPEEL
ORF_30	GAC1, GAC2, GAC4, GAC5, GAC7, GAC9, GAC12, GAC14	C666_1, C666_2, C666_3, C666_8, C666_11, C666_15	MTMPHGTTYPCLSDGMTAHFSCVYTVSSMS
ORF_33		C666_15	MNDVSGFSVGRRRRRLFLNDERRDASAAWAPPG
ORF_34	GAC2, GAC5, GAC9, GAC11, GAC12, GAC15	C666_2, C666_4, C666_5, C666_7, C666_10, C666_11, C666_14, C666_15	MPSGGAAYLRRHSSEPGPRCWVGERARSPPPGAP
ORF_35	GAC1, GAC2, GAC4, GAC5, GAC6, GAC7, GAC8, GAC9, GAC11, GAC12, GAC14	C666_1, C666_2, C666_3, C666_8, C666_11, C666_14, C666_15	MERRVTFSTETRQGVLRSKVLALRALRTANSTSRP
ORF_37	GAC3, GAC10, GAC15		MARRQLYQPKRHVAERARRSRGRASAPAAATSGACAS
ORF_40/RPMS1A	GAC13	C666_4, C666_5, C666_6, C666_9, C666_10, C666_13	MAGARRRARCPASAGCAYSARPPPLSTRGRRISAGSEACC
ORF_42A	GAC1, GAC2, GAC4, GAC5, GAC7, GAC9, GAC12	C666_1, C666_2, C666_3, C666_8, C666_11, C666_15	MARRQLYQPKVTKSLSRTKRRVASTLASKIRHPCLSCSHVAT
ORF_42B	GAC2, GAC5, GAC11, GAC12, GAC15	C666_1, C666_2, C666_4, C666_5, C666_7, C666_10, C666_11, C666_14, C666_15	MARLSRVYSSFLFCRMARYWGCAVKAAAQSAFSASTASPEEL
ORF_53	GAC1, GAC2, GAC6, GAC7, GAC9, GAC10, GAC11, GAC12, GAC14	C666_1, C666_3, C666_4, C666_9, C666_11, C666_14, C666_15	MGTMYQVNFPFSMNRLRGFRTLSTMSWSECITKKGLRNTSLSSAPKNKNATVK
ORF_57	GAC3, GAC4, GAC5, GAC8, GAC13, GAC15	C666_2, C666_5, C666_6, C666_7, C666_8, C666_10, C666_12, C666_13	MCEYGRMTLEMGACAAPAGLRGFRTLSTMSWSECITKKGLRNTSLSSAPKNKNATVK
ORF_62	GAC1, GAC2, GAC4, GAC5, GAC7, GAC9, GAC12, GAC14	C666_1, C666_2, C666_3, C666_8, C666_11, C666_15	MVKTQSLPPQAVRRRSLDRDSVFCVGLENGPWLPAMLCWPLRVRPPSELLSFAPGFAHAALT
ORF_68	GAC1, GAC2, GAC4, GAC5, GAC6, GAC7, GAC8, GAC9, GAC11, GAC12, GAC13, GAC14	C666_1, C666_2, C666_3, C666_4, C666_5, C666_6, C666_7, C666_8, C666_9, C666_10, C666_11, C666_12, C666_13, C666_14, C666_15	MLLSELVDPGVEHLHRLLRHLARAPREGNNQDHHPRHQDQNEHAAEGVFEEGDETRDQAAKQTPHRAD
ORF_80	GAC1, GAC2, GAC4, GAC5, GAC7, GAC9, GAC12	C666_1, C666_2, C666_3, C666_7, C666_8, C666_11, C666_15	MGEGDLVVVAGMVAVAHNGTARDLLHRDPAGGPAVEGAGLEGAEDCKLHVQTLRRAGVEVGLLPKHVHTHAGPIGLAPAQ
ORF_84	GAC1, GAC2, GAC4, GAC5, GAC7, GAC9, GAC12, GAC14	C666_1, C666_2, C666_3, C666_7, C666_8, C666_11, C666_15	MEVQRASVGVCLRPCRALLGTLAPPHALSILVTPHHRQGVLVEAQGGLRPPHIHHPCGAWCLETLGNETQVLLVRLFQKAFIRS
ORF_95	GAC2, GAC5, GAC9, GAC11, GAC12, GAC15	C666_1, C666_2, C666_4, C666_5, C666_7, C666_10, C666_11, C666_14, C666_15	MPGHIREVRNAFWWGSVPAASQQRARATLLGGGKSPLSSARGPVMKVYRLCVSACRCSELRVWVNRCVLMYLEFSKAAPSPARLSSQGPETKARL
ORF_99	GAC2, GAC5, GAC9, GAC11, GAC12, GAC15	C666_1, C666_2, C666_4, C666_5, C666_7, C666_10, C666_11, C666_14, C666_15	MSMPPKGFLKKEMKPETRLLNKPPTVLTRPAMFCAWKLYSRKMPSRSKTLEARCSSRPPCDSPACQTRDTGCPRRSGTGRRGWRARRLGKESWFADAWR
ORF_100	GAC14		MARRQLYQPKPRGHVTHTVGMGEGDLVVVAGMVAVAHNGTARDLLHRDPAGGPAVEGAGLEGAEDCKLHVQTLRRAGVEVGLLPKHVHTHAGPIGLAPAQ
ORF_103/RPMS1	GAC1, GAC2, GAC4, GAC5, GAC7, GAC9, GAC12	C666_1, C666_2, C666_3, C666_7, C666_8, C666_11, C666_15	MAGARRRARCPASAGCAYSARPPPLSTRGRRISAGSGQPRWWPWGSPPPPDTRYRRPGPGRRARSCLHAGPRGRPPHSRTRARRTSPGAGGGGWRGGSCTSQR
ORF_106	GAC6, GAC8, GAC11	C666_12, C666_14	MARRQLYQPKPRGHVTHTVGMGEGDLVVVAGMVAVAHNGTARDLLHRDPAGGPAVEGAGLEGAEDCKLHVQTLRRAGVERHVAERARRSRGRASAPAAATSGACAS
ORF_107	GAC6, GAC8, GAC11, GAC14	C666_12, C666_14	MAGARRRARCPASAGCAYSARPPPLSTRGRRISAGSGQPRWWPWGSPPPPDTRYRRPGPGRRARSCLHAGPRGRPPHSRTRARRTSPGAGGGGWRGGSCTSQSHVAT
ORF_126/A73	GAC1, GAC3, GAC4, GAC6, GAC7, GAC8, GAC10, GAC13, GAC14	C666_3, C666_6, C666_8, C666_9, C666_12, C666_13	MSMPPKGFLKKEMKPETRLLNKPPTVLTRPAMFCAWKLYSRKMPSRSKTLEARCSSRPPCDSPACQTRDTGCPRRSGTGRRGWRARRLGKESWFADAWRMARYWGCAVKAAAQSAFSASTASPEEL
ORF_172	GAC3, GAC10, GAC15		MAGARRRARCPASAGCAYSARPPPLSTRGRRISAGSGQPRWWPWGSPPPPDTRYRRPGPGRRARSCLHAGPRGRPPHSRTRARRTSPGAGGGGWRGGSCTSQRGMLLSELVDPGVEHLHRLLRHLARAPREGNNQDHHPRHQDQNEHAAEGVFEEGDETRDQAAKQTPHRAD
ORF_173/BARF0	GAC1, GAC2, GAC3, GAC4, GAC5, GAC6, GAC7, GAC8, GAC9, GAC10, GAC11, GAC12, GAC13, GAC14, GAC15	C666_1, C666_2, C666_3, C666_4, C666_5, C666_6, C666_7, C666_8, C666_9, C666_10, C666_11, C666_12, C666_13, C666_14, C666_15	MAATLPLPRCTDSMAARVPIEELRELRHLRGHCREDVVGVQRSGRPLCLRPPRARDRALLWAARPRLLLSLQQVPEPRLADFILKQSRDRLRIHRHRQVVTGDVGPLCRGRVAVVGQNHQLAHTAPAGHRGDVEARVWDGTYAPKAAQQIQGPFQALQPHGVRHAIKHAIDSL
