# Supplementary material
Source: HighWire-hosted journal article supplement (doi:10.1101/rna.078800.121)
Supplement: Supplemental_Table_4.xlsx [file Supplemental_Table_4.xlsx]

## Sheet: FLAIR retrieved reads
Dataset	Reference	Selection	Corrected Reads	Inconsistent Reads	Total Reads	Counts_Matrix Quantifiation	Transcript variants
C666-1	Final annotation	All	5245	147919	153164	143024	61
C666-1	Final annotation	Full-length	5245	147919	153164	142307	31
C666-1	RefSeq	All	8346	144818	153164	117696	30
C666-1	RefSeq	Full-length	8346	144818	153164	117452	23
GAC	Final annotation	All	4602	126901	131503	128550	47
GAC	Final annotation	Full-length	4602	126901	131503	127159	26
GAC	RefSeq	All	549	130954	131503	109563	14
GAC	RefSeq	Full-length	549	130954	131503	109520	11

## Sheet: Runtime comparison
Sample	Program	Subfunction/Run	Time Type	Seconds	Ratio Compared to FLAIR
RPMS1-GAC-RefSeq	FLAME	Shortread confirmation + Verbose	Real	54.43	0.184132719
RPMS1-GAC-RefSeq	FLAME	Shortread confirmation + Verbose	User	52.24	0.04160940627
RPMS1-GAC-RefSeq	FLAME	Shortread confirmation + Verbose	System	0.173	0.02958276334
RPMS1-GAC-RefSeq	FLAME	Shortread confirmation	Real	53.255	0.1801577797
RPMS1-GAC-RefSeq	FLAME	Shortread confirmation	User	51.112	0.04071094896
RPMS1-GAC-RefSeq	FLAME	Shortread confirmation	System	0.117	0.02000683995
RPMS1-GAC-RefSeq	FLAME	Verbose	Real	36.53	0.1235783249
RPMS1-GAC-RefSeq	FLAME	Verbose	User	34.67	0.02761481844
RPMS1-GAC-RefSeq	FLAME	Verbose	System	0.104	0.01778385773
RPMS1-GAC-RefSeq	FLAME	Minimal	Real	38.514	0.1302900522
RPMS1-GAC-RefSeq	FLAME	Minimal	User	36.658	0.02919826982
RPMS1-GAC-RefSeq	FLAME	Minimal	System	0.104	0.01778385773
RPMS1-GAC-RefSeq	FLAIR	Junctions-from-sam	Real	7.466	N/A
RPMS1-GAC-RefSeq	FLAIR	Junctions-from-sam	User	7.408	N/A
RPMS1-GAC-RefSeq	FLAIR	Junctions-from-sam	System	0.04	N/A
RPMS1-GAC-RefSeq	FLAIR	Correct	Real	3.222	N/A
RPMS1-GAC-RefSeq	FLAIR	Correct	User	3.065	N/A
RPMS1-GAC-RefSeq	FLAIR	Correct	System	0.178	N/A
RPMS1-GAC-RefSeq	FLAIR	Collapse	Real	121.98	N/A
RPMS1-GAC-RefSeq	FLAIR	Collapse	User	621.21635	N/A
RPMS1-GAC-RefSeq	FLAIR	Collapse	System	2.71	N/A
RPMS1-GAC-RefSeq	FLAIR	Quantify	Real	162.934	N/A
RPMS1-GAC-RefSeq	FLAIR	Quantify	User	623.796	N/A
RPMS1-GAC-RefSeq	FLAIR	Quantify	System	2.92	N/A
RPMS1-GAC-RefSeq	FLAIR	Total Time	Real	295.602	N/A
RPMS1-GAC-RefSeq	FLAIR	Total Time	User	1255.48535	N/A
RPMS1-GAC-RefSeq	FLAIR	Total Time	System	5.848	N/A
