# Supplementary material
Source: HighWire-hosted journal article supplement (doi:10.1101/rna.078800.121)
Supplement: Supplemental_Table_5.docx [file Supplemental_Table_5.docx]

Supplementary Table 5

| ACTB | | | | |
| --- | --- | --- | --- | --- |
| **FLAME** | **Total** |  |  |  |
|  | Annotated reads | 61% | Annotated splice variants | 166 |
|  | Incongruent reads | 39% |  |  |
|  | **Intermediate-confidence** |  |  |  |
|  | Annotated reads | 73% | Annotated splice variants | 49 |
|  | Incongruent reads | 27% |  |  |
|  | **High-confidence** |  |  |  |
|  | Annotated reads | 97% | Annotated splice variants | 15 |
|  | Incongruent reads | 3% |  |  |
| **FLAIR** | Corrected reads | 29% | Annotated splice variants | 15 |
|  | Inconsistent reads | 71% |  |  |
| B2M | | | | |
| **FLAME** | **Total** |  |  |  |
|  | Annotated reads | 73% | Annotated splice variants | 88 |
|  | Incongruent reads | 27% |  |  |
|  | **Intermediate-confidence** |  |  |  |
|  | Annotated reads | 82% | Annotated splice variants | 31 |
|  | Incongruent reads | 18% |  |  |
|  | **High-confidence** |  |  |  |
|  | Annotated reads | 97% | Annotated splice variants | 15 |
|  | Incongruent reads | 3% |  |  |
| **FLAIR** | Corrected reads | 16% | Annotated splice variants | 7 |
|  | Inconsistent reads | 84% |  |  |
| GAPDH | | | | |
| **FLAME** | **Total** |  |  |  |
|  | Annotated reads | 70% | Annotated splice variants | 218 |
|  | Incongruent reads | 30% |  |  |
|  | **Intermediate-confidence** |  |  |  |
|  | Annotated reads | 76% | Annotated splice variants | 65 |
|  | Incongruent reads | 24% |  |  |
|  | **High-confidence** |  |  |  |
|  | Annotated reads | 96% | Annotated splice variants | 23 |
|  | Incongruent reads | 4% |  |  |
| **FLAIR** | Corrected reads | 51% | Annotated splice variants | 32 |
|  | Inconsistent reads | 49% |  |  |
